# Supplementary material for: Environmental risk factors in inflammatory bowel disease: a population-based case-control study in Asia-Pacific
Source: HighWire-hosted journal article supplement (doi:10.1136/gutjnl-2014-307410), 2014-09-12
Supplement: gutjnl-2014-307410supp.pdf [file gutjnl-2014-307410supp.pdf]

Study no. \_\_\_\_\_

Initials: \_\_\_\_\_

Data Entry Completed

**Environmental factors scheme for patients**  
**International Organization of Inflammatory Bowel Disease (IOIBD)**

1. Do you have Siblings? Yes  (if YES, MUST fill in below) No

|                                                                      |                                                                      |                                                                      |
|----------------------------------------------------------------------|----------------------------------------------------------------------|----------------------------------------------------------------------|
| 1a. <input type="checkbox"/> M <input type="checkbox"/> F born year: | 1b. <input type="checkbox"/> M <input type="checkbox"/> F born year: | 1c. <input type="checkbox"/> M <input type="checkbox"/> F born year: |
| 1d. <input type="checkbox"/> M <input type="checkbox"/> F born year: | 1e. <input type="checkbox"/> M <input type="checkbox"/> F born year: | 1f. <input type="checkbox"/> M <input type="checkbox"/> F born year: |
| 1g. <input type="checkbox"/> M <input type="checkbox"/> F born year: | 1h. <input type="checkbox"/> M <input type="checkbox"/> F born year: | 1i. <input type="checkbox"/> M <input type="checkbox"/> F born year: |

2. Do you have children? Yes  No

3. Your ethnical background:

3a. Asian: 1/1\_\_\_\_ 1/2\_\_\_\_ 1/4\_\_\_\_

3b. Other: \_\_\_\_\_ 1/1\_\_\_\_ 1/2\_\_\_\_ 1/4\_\_\_\_

3c. Other: \_\_\_\_\_ 1/1\_\_\_\_ 1/2\_\_\_\_ 1/4\_\_\_\_

3d. Other: \_\_\_\_\_ 1/1\_\_\_\_ 1/2\_\_\_\_ 1/4\_\_\_\_

**Questions concerning your health**

4. Do you have or have had long lasting/repetitive problems with your stomach? Yes  No

If YES, what problems?

4a. Diarrhoea Yes  No

4b. Blood in stool Yes  No

4c. Mucus/pus in stool Yes  No

4d. Abdominal pain Yes  No

4e. Fistulas Yes  No

4f. Constipation Yes  No

4g. Ulcer Yes  No

4h. Other problems, please state \_\_\_\_\_

4i. Have you consulted a doctor regarding these problems? Yes  No

4j. If YES, please state where and when (doctor/hospital, year):

(i)Where \_\_\_\_\_ (ii)when \_\_\_\_\_ (year)

5. Do any of your parents, siblings, half siblings, spouse or children have IBD? Yes  No

If YES, please state who and which disease (for half siblings HS, please state if on the side of your mother or father): Father (F), Mother (M), Sibling (S), Child (C), Spouse (Sp), Half sibling (HS)

|                                                                                                                                                                                    |                                                                                                                                                                                    |                                                                                                                                                                                    |
|------------------------------------------------------------------------------------------------------------------------------------------------------------------------------------|------------------------------------------------------------------------------------------------------------------------------------------------------------------------------------|------------------------------------------------------------------------------------------------------------------------------------------------------------------------------------|
| 5a.<br>F/M/S/C/Sp/ HS- <input type="checkbox"/> mum <input type="checkbox"/> pa<br><input type="checkbox"/> CD/ <input type="checkbox"/> UC/ <input type="checkbox"/> undetermined | 5b.<br>F/M/S/C/Sp/ HS- <input type="checkbox"/> mum <input type="checkbox"/> pa<br><input type="checkbox"/> CD/ <input type="checkbox"/> UC/ <input type="checkbox"/> undetermined | 5c.<br>F/M/S/C/Sp/ HS- <input type="checkbox"/> mum <input type="checkbox"/> pa<br><input type="checkbox"/> CD/ <input type="checkbox"/> UC/ <input type="checkbox"/> undetermined |
|------------------------------------------------------------------------------------------------------------------------------------------------------------------------------------|------------------------------------------------------------------------------------------------------------------------------------------------------------------------------------|------------------------------------------------------------------------------------------------------------------------------------------------------------------------------------|

Study no. \_\_\_\_\_

Initials: \_\_\_\_\_

6. **Childhood factors (up to age 20)**

|                                                                             | Yes                      | Age       | No                       | Unknown                  |
|-----------------------------------------------------------------------------|--------------------------|-----------|--------------------------|--------------------------|
| 6a Brought up together with your siblings<br>Separated at .....years of age | <input type="checkbox"/> | (i)._____ | <input type="checkbox"/> | <input type="checkbox"/> |
| 6b. Shared bedroom<br>Separated at .....years of age                        | <input type="checkbox"/> | (i)._____ | <input type="checkbox"/> | <input type="checkbox"/> |
| 6c. Shared day nursery<br>Separated at .....years of age                    | <input type="checkbox"/> | (i)._____ | <input type="checkbox"/> | <input type="checkbox"/> |
| 6d. Went to the same schools<br>Separated at .....years of age              | <input type="checkbox"/> | (i)._____ | <input type="checkbox"/> | <input type="checkbox"/> |
| 6e. Tonsillectomy done<br>At which age                                      | <input type="checkbox"/> | (i)._____ | <input type="checkbox"/> | <input type="checkbox"/> |
| 6f. Appendectomy done<br>At which age                                       | <input type="checkbox"/> | (i)._____ | <input type="checkbox"/> | <input type="checkbox"/> |
| 6g. Cholecystectomy done<br>At which age                                    | <input type="checkbox"/> | (i)._____ | <input type="checkbox"/> | <input type="checkbox"/> |
| 6h. Breastfed<br>How many months?                                           | <input type="checkbox"/> | (i)._____ | <input type="checkbox"/> | <input type="checkbox"/> |
| 6i. Asthma                                                                  | <input type="checkbox"/> |           | <input type="checkbox"/> | <input type="checkbox"/> |
| 6j. Eczema                                                                  | <input type="checkbox"/> |           | <input type="checkbox"/> |                          |

7. **Vaccinations (up to age 20)**

|                     | Yes                      | No                       | Unknown                  |
|---------------------|--------------------------|--------------------------|--------------------------|
| 7a. BCG (卡介苗)       | <input type="checkbox"/> | <input type="checkbox"/> | <input type="checkbox"/> |
| 7b. Pertussis (百日咳) | <input type="checkbox"/> | <input type="checkbox"/> | <input type="checkbox"/> |
| 7c. Measles (麻疹)    | <input type="checkbox"/> | <input type="checkbox"/> | <input type="checkbox"/> |
| 7d. Rubeola (德國麻疹)  | <input type="checkbox"/> | <input type="checkbox"/> | <input type="checkbox"/> |
| 7e. Diphtheria (白喉) | <input type="checkbox"/> | <input type="checkbox"/> | <input type="checkbox"/> |
| 7f. Tetanus (破傷風)   | <input type="checkbox"/> | <input type="checkbox"/> | <input type="checkbox"/> |
| 7g. Polio (小兒麻痺)    | <input type="checkbox"/> | <input type="checkbox"/> | <input type="checkbox"/> |

8. **Childhood disease (up to age 20)**

|                        | Yes                      | At which age? | No                       | Unknown                  |
|------------------------|--------------------------|---------------|--------------------------|--------------------------|
| 8a. Measles (麻疹)       | <input type="checkbox"/> | (i). _____    | <input type="checkbox"/> | <input type="checkbox"/> |
| 8b. Pertussis (百日咳)    | <input type="checkbox"/> | (i). _____    | <input type="checkbox"/> | <input type="checkbox"/> |
| 8c. Rubeola (德國麻疹)     | <input type="checkbox"/> | (i). _____    | <input type="checkbox"/> | <input type="checkbox"/> |
| 8d. Chicken-pox (水痘)   | <input type="checkbox"/> | (i). _____    | <input type="checkbox"/> | <input type="checkbox"/> |
| 8e. Mumps (腮腺炎)        | <input type="checkbox"/> | (i). _____    | <input type="checkbox"/> | <input type="checkbox"/> |
| 8f. Scarlet fever (喉痧) | <input type="checkbox"/> | (i). _____    | <input type="checkbox"/> | <input type="checkbox"/> |

Study no. \_\_\_\_\_

Initials: \_\_\_\_\_

9. **Antibiotics Used**

|                                | Yes                      | No                       | Unknown                  |
|--------------------------------|--------------------------|--------------------------|--------------------------|
| Antibiotics >4 times per year: | <input type="checkbox"/> | <input type="checkbox"/> | <input type="checkbox"/> |
| 9a. 0-15 years of age          | <input type="checkbox"/> | <input type="checkbox"/> | <input type="checkbox"/> |
| 9b. >15 years of age           | <input type="checkbox"/> | <input type="checkbox"/> | <input type="checkbox"/> |

10. **Pet animal (up to age 20)**

|                           | Yes                      | No                       | No. of years & months<br>with the pet |
|---------------------------|--------------------------|--------------------------|---------------------------------------|
| 10a. Dog                  | <input type="checkbox"/> | <input type="checkbox"/> | (i). ____ (yr) ____ (mth)             |
| 10b. Cat                  | <input type="checkbox"/> | <input type="checkbox"/> | (i). ____ (yr) ____ (mth)             |
| 10c. Rodents              | <input type="checkbox"/> | <input type="checkbox"/> | (i). ____ (yr) ____ (mth)             |
| 10d. Birds                | <input type="checkbox"/> | <input type="checkbox"/> | (i). ____ (yr) ____ (mth)             |
| 10e. Aquarium fishes      | <input type="checkbox"/> | <input type="checkbox"/> | (i). ____ (yr) ____ (mth)             |
| 10f. Regular horse-riding | <input type="checkbox"/> | <input type="checkbox"/> | (i). ____ (yr) ____ (mth)             |

11. **Swimming (up to age 20) (11a to 11d are mutually exclusive)**

|                                | Yes                      |
|--------------------------------|--------------------------|
| 11a. Mainly pool               | <input type="checkbox"/> |
| 11b. Mainly sea                | <input type="checkbox"/> |
| 11c. Mainly river              | <input type="checkbox"/> |
| 11d. Mainly lake               | <input type="checkbox"/> |
| 11e. None of above             | <input type="checkbox"/> |
| 11f. Age at start of swimming? | _____                    |

12. **Smoking habits**

|                                                                                               | Yes                      | No                       |
|-----------------------------------------------------------------------------------------------|--------------------------|--------------------------|
| 12a. Ever smoked (smoked is defined as daily consumption of tobacco for at least six months), | <input type="checkbox"/> | <input type="checkbox"/> |
| If YES,                                                                                       |                          |                          |
| 12b. Are or have you been a cigarette smoker                                                  | <input type="checkbox"/> | <input type="checkbox"/> |
| 12c. Are or have you been pipe or cigar smoker                                                | <input type="checkbox"/> | <input type="checkbox"/> |
| 12d. Were you exposed to daily passive smoking, before age 20                                 | <input type="checkbox"/> | <input type="checkbox"/> |

|                                                          | at diagnosis of IBD           |                                | at present                          |                          |
|----------------------------------------------------------|-------------------------------|--------------------------------|-------------------------------------|--------------------------|
|                                                          | Yes                           | No                             | Yes                                 | No                       |
| 12e. Smoking                                             | (i) <input type="checkbox"/>  | <input type="checkbox"/>       | (ii) <input type="checkbox"/>       | <input type="checkbox"/> |
| 12f. Have or had you stopped and then resumed smoking    |                               | Yes <input type="checkbox"/>   | No <input type="checkbox"/>         |                          |
| 12g. When did you start smoking                          |                               | Age: _____                     |                                     |                          |
| 12h. When did you stop smoking                           |                               | Age: _____                     |                                     |                          |
| 12i. When did you resume smoking                         |                               | Age: _____                     |                                     |                          |
| 12j. Have you stopped and resumed smoking more than once |                               | Yes <input type="checkbox"/>   | No <input type="checkbox"/>         |                          |
| 12k. When did you last stop smoking                      |                               | Age: _____                     |                                     |                          |
| 12l. How many cigarettes do/did you smoke per day        | <input type="checkbox"/> 1-10 | <input type="checkbox"/> 11-20 | <input type="checkbox"/> 21 or more |                          |

13. **Contraceptives (for female only)**

|                                                             | Yes                      | No                                         |
|-------------------------------------------------------------|--------------------------|--------------------------------------------|
| 13a. Have you used a contraceptive pill                     | <input type="checkbox"/> | <input type="checkbox"/>                   |
| If YES, when did you start? : (i). _____                    |                          |                                            |
| 13b. Do you still use the contraceptive pill                | <input type="checkbox"/> | <input type="checkbox"/> (i). stop yr_____ |
| 13c. If used intermittently - how many years of use totally |                          | Number of year: _____                      |

14. **Physical activities**

| Regular physical activities (walking, jogging, cycling, swimming >30 minutes or similar activities) | before diagnosis of IBD      | at present                    |
|-----------------------------------------------------------------------------------------------------|------------------------------|-------------------------------|
| 14a. Daily                                                                                          | (i) <input type="checkbox"/> | (ii) <input type="checkbox"/> |
| 14b. Weakly                                                                                         | (i) <input type="checkbox"/> | (ii) <input type="checkbox"/> |
| 14c. Less often                                                                                     | (i) <input type="checkbox"/> | (ii) <input type="checkbox"/> |

15. **Food (Food habits before diagnosis)**

15a. Fruit, all type  
 Daily  Weekly  Less Frequently

15b. Vegetables, all types  
 Daily  Weekly  Less Frequently

15c. Eggs  
 Daily  Weekly  Less Frequently

15d. Bread (slices/day)  
 6+  4-5  0-3

15e. Type of bread  
 Wholemeal  Other

15f. Breakfast - Muesli-type  
 Daily  Weekly  Less Frequently

15g. Breakfast cereals - Cornflakes-type  
 Daily  Weekly  Less Frequently

15h. Additional sugar in:

(i). Breakfast cereals with milk  Porridge

(ii). Coffee (teaspoons-lumps/cup)  
 2+  1  0

(iii). Tea (teaspoons-lumps/cup)  
 2+  1  0

15i. Fast food (food from a hot-dog stand or a hamburger restaurant)  
 Twice or more/week  Once a week  Less frequently

15j. Drinks – Juice  
 Daily  Weekly  Less Frequently

15k. Drinks - Soft drinks  
 Daily  Weekly  Less Frequently

15l. Drinks – Coffee  
 3+  1-2  0

15m. Drinks – Tea  
 3+  1-2  0

Study no. \_\_\_\_\_

Initials: \_\_\_\_\_

**16. Living situation as below: (mutually exclusive of City, Town & countryside in each row)**

|                               | <b>City</b>              | <b>Town</b>              | <b>Countryside</b>       |
|-------------------------------|--------------------------|--------------------------|--------------------------|
| 16a. Infant (0-5years)        | <input type="checkbox"/> | <input type="checkbox"/> | <input type="checkbox"/> |
| 16b. Child (6-11years)        | <input type="checkbox"/> | <input type="checkbox"/> | <input type="checkbox"/> |
| 16c. Adolescent (12-16 years) | <input type="checkbox"/> | <input type="checkbox"/> | <input type="checkbox"/> |

**17. Sanitary conditions before age 20**

|                         | <b>Yes</b>               | <b>No</b>                |
|-------------------------|--------------------------|--------------------------|
| 17a. In house water tap | <input type="checkbox"/> | <input type="checkbox"/> |
| 17b. Hot-water tap      | <input type="checkbox"/> | <input type="checkbox"/> |
| 17c. Separate bathroom  | <input type="checkbox"/> | <input type="checkbox"/> |
| 17d. Flush toilet       | <input type="checkbox"/> | <input type="checkbox"/> |
| 17e. Main drainage      | <input type="checkbox"/> | <input type="checkbox"/> |

**18. Travelling (before age 20)**

|                                                                               | <b>Yes</b>               | <b>No</b>                |
|-------------------------------------------------------------------------------|--------------------------|--------------------------|
| 18. Travelling abroad                                                         | <input type="checkbox"/> | <input type="checkbox"/> |
| 18a. If YES, at which age(i)_____, place (ii)_____ & duration (iii)_____ days |                          |                          |
| 18b. If YES, at which age(i)_____, place (ii)_____ & duration (iii)_____ days |                          |                          |
| 18c. If YES, at which age(i)_____, place (ii)_____ & duration (iii)_____ days |                          |                          |

**19. Major stressful event before diagnosis**

Yes  No

19a. Death of family member: pa / ma / grandparents / spouse / children / siblings

19b. Economic catastrophe. Specify: \_\_\_\_\_

19c. Immigration. From (i)\_\_\_\_\_ to (ii)\_\_\_\_\_, at age (iii)\_\_\_\_\_

19d. Other, Specify: \_\_\_\_\_

Study no. \_\_\_\_\_

Initials: \_\_\_\_\_

**Date of answering the questionnaire**    \_\_\_\_ / \_\_\_\_ / \_\_\_\_    (yy/mmm/dd e.g. 11/APR/17)

**Investigator Or Co-ordinator's Signature:** \_\_\_\_\_

**Full name:**
