# Supplementary material for: Environmental risk factors in inflammatory bowel disease: a population-based case-control study in Asia-Pacific
Source: HighWire-hosted journal article supplement (doi:10.1136/gutjnl-2014-307410), 2014-09-12
Supplement: gutjnl-2014-307410supp_table1.pdf [file gutjnl-2014-307410supp_table1.pdf]

**Supplementary Table 1: Cases and controls as per each country**

|                  | Cases (IBD) | Controls   |
|------------------|-------------|------------|
| Hong Kong        | 107         | 227        |
| Macau            | 15          | 35         |
| China (mainland) | 133         | 279        |
| Indonesia        | 5           | 10         |
| Singapore        | 20          | 43         |
| Malaysia         | 9           | 22         |
| Thailand         | 30          | 60         |
| Sri Lanka        | 55          | 113        |
| Australia        | 68          | 151        |
| <b>Total</b>     | <b>442</b>  | <b>940</b> |
