# Supplementary material for: Environmental risk factors in inflammatory bowel disease: a population-based case-control study in Asia-Pacific
Source: HighWire-hosted journal article supplement (doi:10.1136/gutjnl-2014-307410), 2014-09-12
Supplement: gutjnl-2014-307410supp_table2.pdf [file gutjnl-2014-307410supp_table2.pdf]

**Supplementary Table 2: Multi-variate analysis of all factors associated with IBD development**

| Variables                    | OR (95% CI)         | P value |
|------------------------------|---------------------|---------|
| <b>Crohn's disease</b>       |                     |         |
| Breastfeeding > 12 months    | 0.145 (0.049-0.427) | 0.000   |
| Antibiotic use before age 15 | 0.246 (0.086-0.708) | 0.009   |
| Pet animals                  |                     |         |
| Dogs                         | 0.503 (0.276-0.916) | 0.025   |
| Fish                         | 0.473 (0.226-0.990) | 0.047   |
| Daily tea consumption        | 0.608 (0.411-0.900) | 0.013   |
| Physical activity (weekly)   | 0.594 (0.375-0.942) | 0.027   |
| <b>Ulcerative colitis</b>    |                     |         |
| Breastfeeding > 12 months    | 0.063 (0.018-0.217) | 0.000   |
| Fish                         | 0.333 (0.134-0.827) | 0.018   |
| Ex-smoking                   | 2.545 (1.466-4.417) | 0.001   |
| Daily coffee consumption     | 0.577 (0.402-0.827) | 0.003   |
| Daily tea consumption        | 0.669 (0.481-0.929) | 0.017   |
